# Supplementary material for: Isolation and Characterisation of Streptococcus spp. with Human Milk Oligosaccharides Utilization Capacity from Human Milk
Source: MDPI journal article supplement (doi:10.3390/foods13091291), 2024-04-23
Supplement: s1 [file s1]

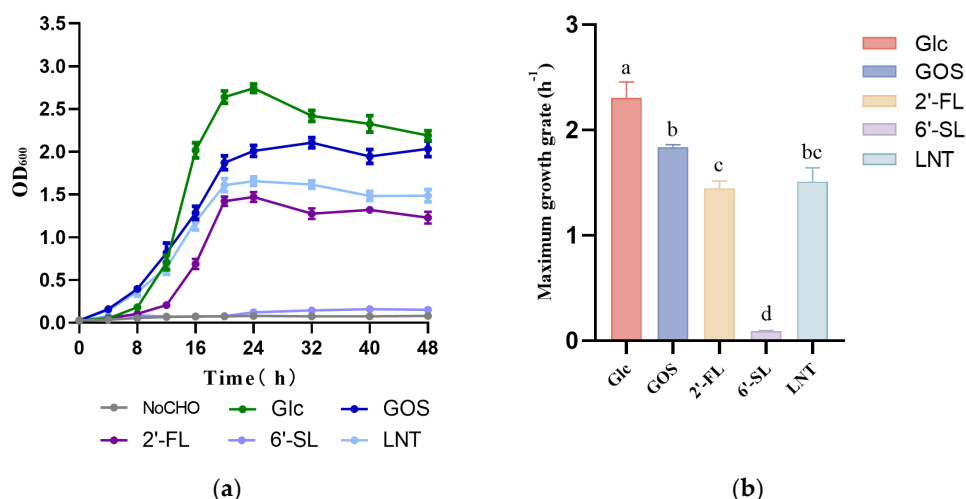

Figure S1 The growth curve and maximum growth rate of *B. longum* subsp. *infantis* ATCC 15697; (a) Growth curve; (b) Maximum growth rate. The carbohydrates were denoted by their abbreviation. No Carbohydrate (NoCHO), Glucose (Glc). Each data point reflected the average of three replicates, with the error bars denoting standard deviation. The letters a, b, c, and d indicated statistically significant variances among groups distinguished by different letters ( $P < 0.05$ ).

Table S1: The 16S rRNA sequences of *Streptococcus* sp. strains.

| Strains                                 | 16S rRNA Sequences                                                                                                                                                                                                                                                                                                                                                                                                                                                                                                                                                                                                                                                                                                                                                                                                                                                                                                                                                                                                                                                                                                                                                                                                                                                                                                                                                                             |
|-----------------------------------------|------------------------------------------------------------------------------------------------------------------------------------------------------------------------------------------------------------------------------------------------------------------------------------------------------------------------------------------------------------------------------------------------------------------------------------------------------------------------------------------------------------------------------------------------------------------------------------------------------------------------------------------------------------------------------------------------------------------------------------------------------------------------------------------------------------------------------------------------------------------------------------------------------------------------------------------------------------------------------------------------------------------------------------------------------------------------------------------------------------------------------------------------------------------------------------------------------------------------------------------------------------------------------------------------------------------------------------------------------------------------------------------------|
| <i>Streptococcus</i> sp.<br>21WXB0057M1 | >21WXB0057M1_gene1708<br>CTATACATGCAGTAGAACGCTGAAGGAAGGAGCTTGCTCTTTCCG<br>GATGAGTTGCGAACGGGTGAGTAACGCGTAGGTAACCTGCCTGGT<br>AGCGGGGGATAACTATTGGAAACGATAGCTAATACCGCATAACAG<br>TAGATATCGCATGATAGCTGCTTGAAAGGTGCAAATGCACCACTA<br>CCAGATGGACCTGCGTTGTATTAGCTAGTTGGTGAGGTAACGGCTC<br>ACCAAGGCAACGATACATAGCCGACCTGAGAGGGTGATCGGCCA<br>CACTGGGACTGAGACACGGCCCAGACTCCTACGGGAGGCAGCAGT<br>AGGGAATCTTCGGCAATGGACGGAAGTCTGACCGAGCAACGCCCG<br>GTGAGTGAAGAAGGTTTTCGGATCGTAAAGCTCTGTTGTAAGAGA<br>AGAACGAGTGTGAGAGTGGAAGTTCACTGTGACGGTATCTTA<br>CCAGAAAGGGACGGCTAACTACGTGCCAGCAGCCGCGGTAATAC<br>GTAGGTCCCCGAGCGTTGTCCGGATTTATTGGGCGTAAAGCGAGCG<br>CAGGCGGTTAGATAAGTCTGAAGTTAAAGGCTGTGGCTTAACCAT<br>AGTACGCTTTGGAAACTGTTAACTTGAGTGCAAGAGGGGAGAGT<br>GGAATTCCATGTGTAGCGGTGAAATGCGTAGATATATGGAGGAAC<br>ACCGGTGCGAAAGCGGCTCTCTGGCTTGTAAGTACGCTGAGGC<br>TCGAAAGCGTGGGGAGCAAACAGGATTAGATACCCTGGTAGTCCA<br>CGCCGTAAACGATGAGTGCTAGGTGTTAGACCCTTTCCGGGGTTTA<br>GTGCCGTAGCTAACGCATTAAGCACTCCGCCTGGGGAGTACGACC<br>GCAAGGTTGAAACTCAAAGGAATTGACGGGGGCCCCGACAAGCG<br>GTGGAGCATGTGGTTTAATTGCAAGCAACGCGAAGAACCTTACCA<br>GGTCTTGACATCCCTCTGACCGCTCTAGAGATAGAGTTTTCCTTCG<br>GGACAGAGGTGACAGGTGGTGCATGGTTGTCGTCAGCTCGTGTCTG<br>GAGATGTTGGGTTAAGTCCCAGCAACGAGCGCAACCCCTATTGTTAG<br>TTGCCATCATTGAGTTGGGCACTCTAGCGAGACTGCCGGTAATAAA<br>CCGGAGGAAGGTGGGGATGACGTCAAATCATCATGCCCTTATGA<br>CCTGGGCTACACACGTGCTACAATGGTTGGTACAACGAGTCGCAA |

GCCGGTGACGGCAAGCTAATCTCTTAAAGCCAATCTCAGTTCGGAT  
TGTAGGCTGCAACTCGCCTACATGAAGTCGGAATCGCTAGTAATC  
GCGGATCAGCACGCCGCGGTGAATACGTTCCCGGGCCTTGTACAC  
ACCGCCCGTCACACCACGAGAGTTTGTAAACACCCGAAGTCGGTGA  
GGTAACCTTTAGGAGCCAGCCGTCG

---

>21WXB0044M1\_gene1818

CTATACATGCAGTAGAACGCTGAAGGAGGAGCTTGCTTCTCTGGAT  
GAGTTGCGAACGGGTGAGTAACGCGTAGGTAACCTGCCTGGTAGC  
GGGGGATAACTATTGGAAACGATAGCTAATACCGCATAAGAGTAG  
ATGTTGCATGACATTTGCTTAAAAGGTGCAATTGCATCACTACCAG  
ATGGACCTGCGTTGTATTAGCTAGTTGGTGAGGTAACGGCTCACCA  
AGGCGACGATACATAGCCGACCTGAGAGGGTGATCGGCCACACTG  
GGACTGAGACACGGCCCAGACTCCTACGGGAGGCAGCAGTAGGG  
AATCTTCGGCAATGGACGGAAGTCTGACCGAGCAACGCCGCGTGA  
GTGAAGAAGGTTTTCGGATCGTAAAGCTCTGTTGTAAGAGAAGAA  
CGAGTGTGAGAGTGGAAGTTCACACTGTGACGGTATCTTACCAG  
AAAGGGACGGCTAACTACGTGCCAGCAGCCGCGGTAATACGTAG  
GTCCCGAGCGTTGTCCGGATTTATTGGGCGTAAAGCGAGCGCAGG  
CGGTTAGATAAGTCTGAAGTTAAAGGCTGTGGCTTAACCATAGTAC  
GCTTTGGAACTGTTTAACTTGAGTGCAAGAGGGGAGAGTGGAAT  
TCCATGTGTAGCGGTGAAATGCGTAGATATATGGAGGAACACCGG  
TGCGGAAAGCGGCTCTCTGGCTTGTAAGTACGCTGAGGCTCGAA  
AGCGTGGGGAGCAAACAGGATTAGATACCCTGGTAGTCCACGCCG  
TAAACGATGAGTGCTAGGTGTTAGACCCTTTCCGGGGTTTAGTGCC  
GCAGCTAACGCATTAAGCACTCCGCCTGGGGAGTACGACCGCAAG  
GTTGAAACTCAAAGGAATTGACGGGGGCCCCGACAAAGCGGTGGA  
GCATGTGGTTTAATTGCAAGCAACGCGAAGAACCTTACCAGGTCTT  
GACATCCCTCTGACCGCTCTAGAGATAGAGTTTTCCCTTCGGGACAG  
AGGTGACAGGTGGTGCATGGTTGTCGTCAGCTCGTGTCTGTGAGATG  
TTGGGTAAAGTCCCGCAACGAGCGCAACCCCTATTGTTAGTTGCCA  
TCATTAGTTGGGCACTCTAGCGAGACTGCCGGTAATAAACCGGA  
GGAAGGTGGGGATGACGTCAAATCATCATGCCCCCTATGACCTGG  
GCTACACACGTGCTACAATGGCTGGTACAACGAGTCGCAAGCCGG  
TGACGGCAAGCTAATCTCTTAAAGCCAGTCTCAGTTCGGATTGTAG  
GCTGCAACTCGCTACATGAAGTCGGAATCGCTAGTAATCGCGGA  
TCAGCACGCCGCGGTGAATACGTTCCCGGGCCTTGTACACACCGC  
CCGTCACACCACGAGAGTTTGTAAACACCCGAAGTCGGTGAGGTAA  
CCTTTAGGAGCCAGCC

*Streptococcus* sp.  
21WXB0044M1

---

>BJSWXB5TM5\_gene0977

GCGGCTGGCTCCTAAAAGGTTACCTCACCGACTTCGGGTGTTACAA  
ACTCTCGTGGTGTGACGGGCGGTGTGTACAAGGCCCGGGAACGTA  
TTCACCGCGGCGTGCTGATCCGCGATTACTAGCGATTCCGACTTCA  
TGTAGGCGAGTTGCAGCCTACAATCCGAAGTACGAGTGGCTTTAA  
GAGATTAGCTTGCCGTACCGACTTGCGACTCGTTGTACCAGCCAT  
TGTAGCACGTGTGTAGCCCAGGTCATAAGGGGCATGATGATTTGA  
CGTCATCCCCACCTTCTCCGGTTTATTACCGGCAGTCTCGCTAGA  
GTGCCCCAACTAAATGATGGCAACTAACAATAGGGGTTGCGCTCGT  
TGCGGGACTTAACCCAAACATCTCACGACACGAGCTGACGACAACC  
ATGCACCACCTGTCACCTCTGTCCCGAAGGAAAGCTCTATCTCTAG  
AGCGGTCAGAGGGATGTCAAGACCTGGTAAGGTTCTTCGCGTTGCT  
TCGAATTAAACCATGCTCCACCGCTTGTGCGGGCCCCCGTCAAT

*Streptococcus* sp.  
BJSWXB5TM5

TCCTTTGAGTTTCAACCTTGCGGTCGTA TCCCCAGGCGGAGTGCTT  
AATGCGTTAGCTACGGCACTAAACCCCGGAAAGGGTCTAACACCT  
AGCACTCATCGTTTACGGCGTGGACTACCAGGGTATCTAATCCTGT  
TTGCTCCCCACGCTTTCGAGCCTCAGCGTCAGTTACAAGCCAGAGA  
GCCGCTTTCGCCACCGGTGTTCTCCATATATCTACGCATTTACCG  
CTACACATGGAATTCACCTCTCCCCTCTTGCACTCAAGTTAAACAG  
TTTCCAAAGCGTACTATGGTTAAGCCACAGCCTTTAACTTCAGACT  
TATCTAACCGCCTGCGCTCGCTTTACGCCCAATAAATCCGGACAAC  
GCTCGGGACCTACGTATTACCGCGGCTGCTGGCACGTAGTTAGCCG  
TCCCTTTCTGGTAAGATACCGTCACAGTGTGAACCTTTCCACTCTCAC  
ACTCGTTCTTCTCTTACAACAGAGCTTTACGATCCGAAAACCTTCTT  
CACTACGCGGCGTTGCTCGGTACAGACTTCCGTCCATTGCCGAAGA  
TTCCCTACTGCTGCCTCCCGTAGGAGTCTGGGCCGTGTCTCAGTCCC  
AGTGTGGCCGATCACCTCTCAGGTCGGCTATGTATCGTCGCCTTG  
GTGAGCCGTTACCTACCAACTAGCTAATAACAACGCAGGTCCATCT  
GGTAGTGATGCAATTGCACCTTTCAAGCAGATATCATGCAATATCT  
ACTGTTATGCGGTATTAGCTATCGTTTCCAATAGTTATCCCCCGCTA  
CCAGGCAGGTTACCTACGCGTACTCACCCGTTGCAACTCATCCG  
GAGAAGCAAGCTCCTCCTTCAGCGTTCTACTGCATGTATAG

---

>JSWX21M4MR\_gene1859

TTGCTTCTCCGATGAGTTGCGAACGGGTGAGTAACGCGTAGGTAA  
CCTGCCTGGTAGCGGGGATAACTATTGGAAACGATAGCTAATAC  
CGCATAACAGTAGATATTGCATGATATCTGCTTGAAAGGTGCAATT  
GCATCACTACCAGATGGACCTGCGTTGTATTAGCTAGTTGGTGAGG  
TAACGGCTCACCAAGGCAACGATACATAGCCGACCTGAGAGGGTG  
ATCGGCCACACTGGGACTGAGACACGGCCCAGACTCCTACGGGAG  
GCAGCAGTAGGGAATCTTCGGCAATGGACGGAAGTCTGACCGAGC  
AACGCCGCGTGAGTGAAGAAGGTTTTTCGGATCGTAAAGCTCTGTT  
GTAAGAGAAGAACGAGTGTGAGAGTGGAAAGTTCACACTGTGAC  
GGTATCTTACCAGAAAGGGACGGCTAACTACGTGCCAGCAGCCGC  
GGTAATACGTAGGTCCCGAGCGTTGTCCGGATTTATTGGGCGTAAA  
GCGAGCGCAGGCGGTTAGATAAGTCTGAAGTTAAAGGCTGTGGCT  
TAACCATAGTACGCTTTGGAAACTGTTTAACTTGAGTGCAAGAGGG  
GAGAGTGGAATTCATGTGTAGCGGTGAAATGCGTAGATATATGG  
AGGAACACCGGTGGCGAAAGCGGCTCTCTGGCTTGTAAGTACGCG  
TGAGGCTCGAAAGCGTGCGGAGCAAACAGGATTAGATACCCTGGT  
AGTCCACGCCGTAACGATGAGTGCTAGGTGTTAGACCCTTTCCGGG  
GTTTAGTGCCGTAGCTAACGCATTAAGCACTCCGCCTGGGGAGTAC  
GACCGCAAGGTTGAAACTCAAAGGAATTGACGGGGGCCCCGCACA  
AGCGGTGGAGCATGTGGTTTAATTCTGAAGCAACGCGAAGAACCTT  
ACCAGGTCTTGACATCCCTCTGACCGCTCTAGAGATAGAGTTTTCC  
TTCGGGACAGAGGTGACAGGTGGTGCATGGTTGTCGTCAGCTCGTG  
TCGTGAGATGTTGGGTAAAGTCCCGCAACGAGCGCAACCCCTATTG  
TTAGTTGCCATCATTTAGTTGGGCACTCTAGCGAGACTGCCGGTAA  
TAAACCGGAGGAAGGTGGGGATGACGTCAAATCATCATGCCCTT  
ATGACCTGGGCTACACACGTGCTACAATGGCTGGTACAACGAGTC  
GCAAGTCGGTGACGGCAAGCTAATCTCTTAAAGCCAGTCTCAGTTC  
GGATTGTAGGCTGCAACTCGCTACATGAAGTCGGAATCGCTAGT  
AATCGCGGATCAGCACGCCGCGGTGAATACGTTCCCGGGCCTTGT  
ACACACCGCCCCGTCACACCACGAGAGTT

---

*Streptococcus* sp.  
JSWX21MRM4
